# Supplementary material for: Urinary cytokeratin 20 as a predictor for chronic kidney disease following acute kidney injury
Source: JCI journal article supplement (doi:10.1172/jci.insight.180326), 2024-05-28
Supplement: sd1 [file 1]

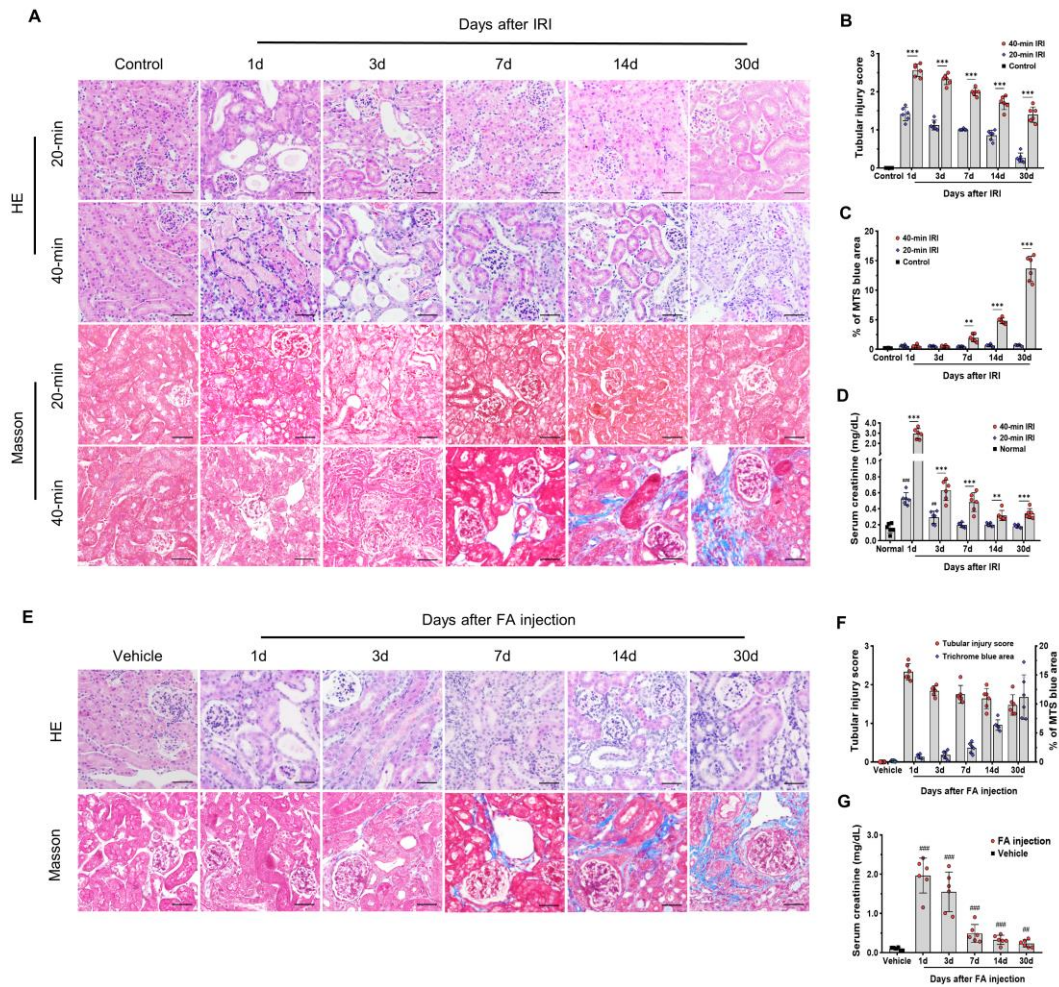

**Supplemental Figure 1. Acute tubular injury, subsequent interstitial fibrosis, and changes in kidney function after IRI and FA-injection in mouse models.**

(A) Representative images of HE and Masson's trichrome staining in mouse kidneys with 20-min and 40-min IRI at indicated time after AKI. (B and C) Tubular injury score based on HE staining (B) and the percentage of the positive area for Masson's trichrome staining (C) in 20-min and 40-min IRI kidneys. (D) Levels of serum creatinine at indicated time after 20-min and 40-min IRI. (E) Representative images of HE and Masson's trichrome staining on FA-injection mouse kidneys at indicated time. (F) Tubular injury score based on HE staining and the percentage of the positive area based on Masson's trichrome staining in FA-injection mice. (G) Levels of serum creatinine at indicated time in mouse after FA-injection.  $n = 6$  for each group of mice. Data are expressed as the mean  $\pm$  SD. \*Comparison between 20-min and 40-min IRI,  $**P < 0.01$ , and  $***P < 0.001$ ; #compared with control/normal/vehicle group,  $##P < 0.01$ , and  $###P < 0.001$ . Scale bar =  $50\mu\text{m}$ .

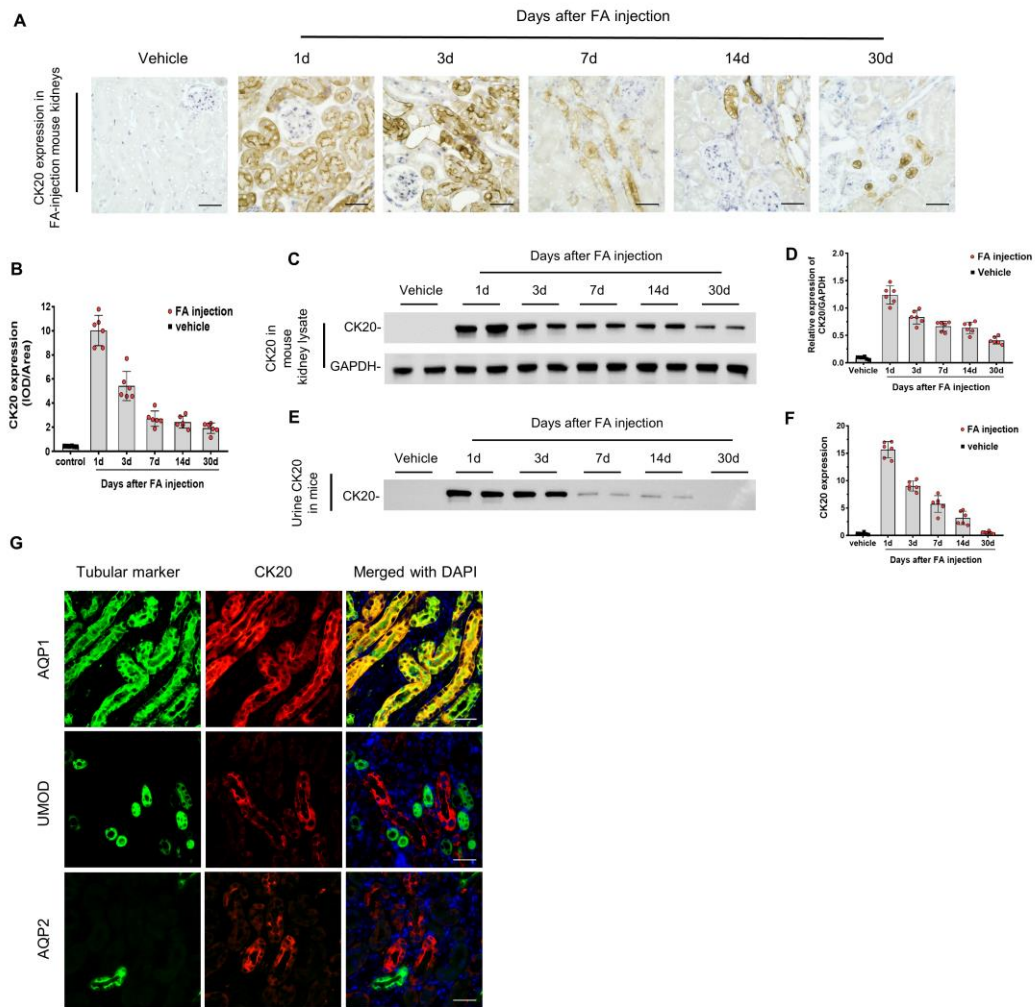

### Supplemental Figure 2. Expression of CK20 in FA-injection mouse model.

(A) Representative images of immunohistochemistry staining of CK20 in FA-injected mouse kidneys at indicated time after AKI. (B) Semi-quantitative analysis of IOD for Figure A. (C and D) Western blotting (C) and semi-quantitative data (D) of CK20 levels in kidney lysate after FA-injection. (E and F) Western blotting (E) and semi-quantitative data (F) of uCK20 concentrations at the indicated time in FA-injection mice. (G) Double immunofluorescence staining to determine expression of CK20 and segment-specific tubular markers in kidneys from FA-injection mice. The expression of CK20 colocalized with proximal tubules marker AQP1, but not with thick ascending limbs marker UMOD and collecting ducts marker AQP2. Data are expressed as the mean  $\pm$  SD. n = 6 for each group. Scale bar = 50 $\mu$ m.

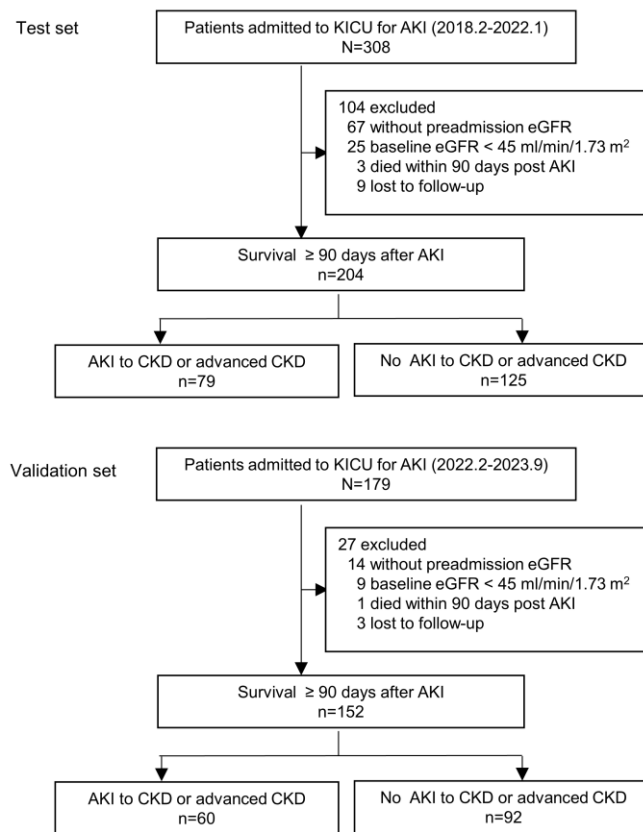

**Supplemental Figure 3. Flow chart for Test and Validation set.**

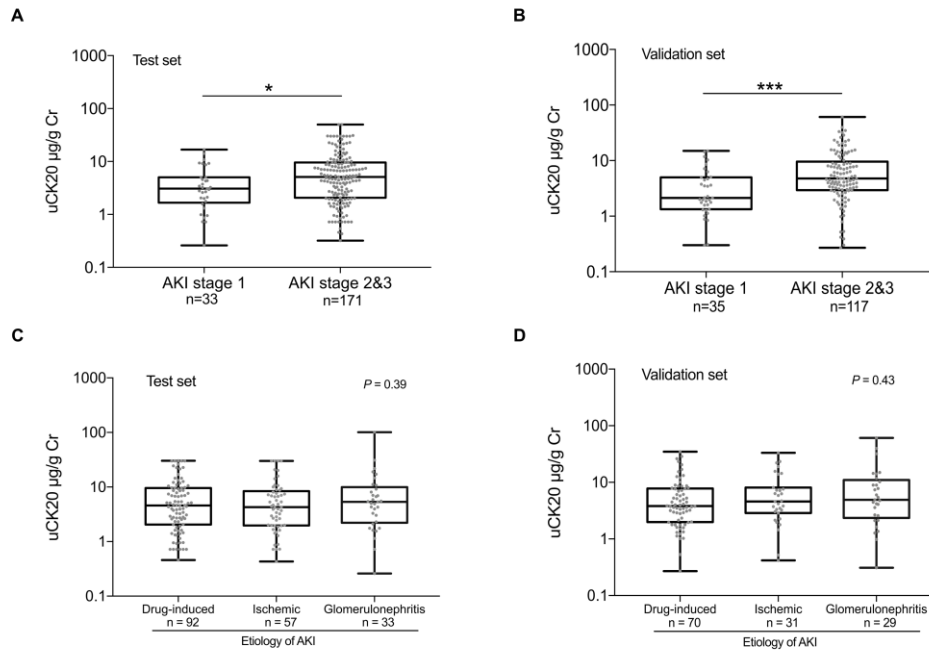

**Supplemental Figure 4. Concentrations of uCK20 among patients grouped by AKI stages and etiologies in Test and Validation set.**

(A and B) uCK20 concentrations in mild AKI (stage 1) and severe AKI (stage 2 or 3) in Test set (A) and Validation set (B). (C and D) uCK20 concentrations in different AKI etiologies in Test set (C) and Validation set (D). The horizontal lines represent the median and bounds of box-and-whisker plots representing the 25th and 75th percentiles, with upper and lower extremes represented by whiskers. Mann-Whitney test or Kruskal-Wallis test,  $*P < 0.05$ , and  $***P < 0.001$ .

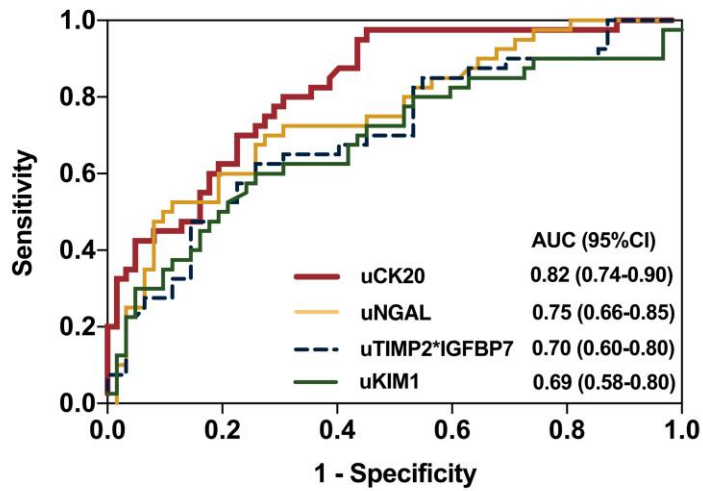

Predicting severe ATI in patients who underwent kidney biopsy

| Marker                                              | Best cutoff | Sensitivity | Specificity |
|-----------------------------------------------------|-------------|-------------|-------------|
| uCK20, $\mu\text{g/g Cr}$                           | 5.2         | 0.78        | 0.71        |
| uNGAL, $\mu\text{g/g Cr}$                           | 253.2       | 0.70        | 0.73        |
| uTIMP-2*IGFBP-7 ( $\mu\text{g/g Cr}$ ) <sup>2</sup> | 2143.6      | 0.63        | 0.74        |
| uKIM-1, $\mu\text{g/g Cr}$                          | 5.2         | 0.58        | 0.76        |

**Supplemental Figure 5. AUCs of uCK20 and other kidney injury biomarkers for predicting severe ATI in patients received kidney biopsy.**

Severe ATI was defined as injured tubular involvement > 25%. n=102 for patients received kidney biopsy.

**Supplemental Table 1. Characteristics of Validation cohort**

| Variables                                      | Total<br>(n=152) | Outcome <sup>A</sup> |                | P value |
|------------------------------------------------|------------------|----------------------|----------------|---------|
|                                                |                  | Yes (n=60)           | No (n=92)      |         |
| Age, yr                                        | 44.2 ± 17.5      | 49.0 ± 17.4          | 41.1 ± 16.9    | 0.006   |
| Male/female, n                                 | 107/45           | 40/20                | 67/25          | 0.41    |
| Diabetes, n (%)                                | 24 (14.8)        | 9 (20.3)             | 15 (11.8)      | 0.82    |
| Hypertension, n (%)                            | 63 (41.4)        | 31 (51.7)            | 32 (34.8)      | 0.04    |
| Pre-existing CKD <sup>B</sup> , n (%)          | 21 (13.8)        | 13 (21.7)            | 8 (8.7)        | 0.03    |
| Baseline serum creatinine, µmol/L              | 92.6 ± 22.7      | 95.3 ± 25.7          | 90.9 ± 20.5    | 0.24    |
| Baseline eGFR, ml/min/1.73m <sup>2</sup>       | 82.8 ± 22.6      | 76.8 ± 20.3          | 86.7 ± 23.2    | 0.01    |
| AKI etiology, n (%)                            |                  |                      |                |         |
| Drug-induced                                   | 70 (46.1)        | 24 (40.0)            | 46 (50.0)      | 0.23    |
| Ischemic                                       | 31 (20.4)        | 18 (30.0)            | 13 (14.1)      | 0.03    |
| Glomerulonephritis                             | 29 (19.1)        | 12 (20.0)            | 17 (18.5)      | 0.82    |
| Sepsis                                         | 10 (6.6)         | 3 (5.0)              | 7 (7.6)        | 0.52    |
| Others                                         | 12 (7.9)         | 3 (5.0)              | 9 (9.8)        | 0.28    |
| AKI stage 2&3, n (%)                           | 117 (77.0)       | 56 (93.3)            | 61 (66.3)      | <0.001  |
| RRT, n (%)                                     | 42 (27.6)        | 28 (46.7)            | 14 (15.2)      | <0.001  |
| Parameters at time of AKI diagnosis            |                  |                      |                |         |
| Serum creatinine, µmol/L                       | 328 (188-580)    | 526 (320-737)        | 234 (159-438)  | <0.001  |
| Serum albumin, g/L                             | 33.8 ± 8.4       | 32.7 ± 8.0           | 34.5 ± 8.6     | 0.18    |
| Hemoglobin, g/L                                | 108.1 ± 32.9     | 94.9 ± 24.7          | 116.6 ± 34.8   | <0.001  |
| Plasma CK20, ng/mL                             | 3.0 (1.9-4.8)    | 3.4 (2.5-6.1)        | 2.9 (1.6-4.3)  | 0.09    |
| Urinary CK20, µg/g Cr                          | 4.2 (2.1-8.6)    | 7.7 (4.2-16.6)       | 3.0 (1.8-5.1)  | <0.001  |
| Urinary KIM-1, µg/g Cr                         | 3.3 (1.8-5.0)    | 4.3 (1.8-6.2)        | 3.0 (1.7-4.3)  | 0.05    |
| Urinary NGAL, µg/g Cr                          | 148 (61-508)     | 402 (148-783)        | 106 (47-175)   | <0.001  |
| Urinary TIMP-2*IGFBP-7, (µg/g Cr) <sup>2</sup> | 1007 (166-3025)  | 1762 (999-4799)      | 504 (111-1557) | <0.001  |
| UACR, mg/g Cr                                  | 541 (83-2359)    | 1135 (395-3148)      | 273 (55-1628)  | <0.001  |
| Serum creatinine at discharge, µmol/L          | 211 (156-357)    | 328 (217-502)        | 181 (133-232)  | <0.001  |
| RRT at discharge, n (%)                        | 3 (2.0)          | 3 (5.0)              | 0 (0)          | 0.03    |

<sup>A</sup>Outcome was AKI to CKD or advanced CKD progression. In patients with preadmission eGFR ≥ 60 ml/min /1.73m<sup>2</sup>, AKI to CKD progression was defined as a persistent eGFR < 60ml/min/1.73m<sup>2</sup> and with a minimum 25% reduction from baseline eGFR 90 days after AKI. In patients with prehospitalization eGFR 45-60ml/min/1.73m<sup>2</sup>, AKI to advanced CKD was defined by a sustained reduction of eGFR < 30 ml/min/1.73m<sup>2</sup> 90 days after AKI.

<sup>B</sup>Pre-existing CKD was defined as eGFR 45-60ml/min/1.73m<sup>2</sup>.

Continuous variables were expressed as mean ± SD or median (25th percentile-75th percentile, interquartile range). Categorical variables were expressed as a number (%).

RRT, renal replacement therapy; CK20, cytokeratin 20; KIM-1, kidney injury molecule-1; NGAL, Neutrophil gelatinase-associated lipocalin; TIMP-2, tissue inhibitor of metalloproteinase 2; IGFBP-7, insulin-like growth factor-binding protein 7; UACR, urine albumin to creatinine ratio.

**Supplemental Table 2. Characteristics of 102 patients who received kidney biopsy**

| Variable                                       | Total<br>(n=102) | Outcome <sup>A</sup> |                 | P value |
|------------------------------------------------|------------------|----------------------|-----------------|---------|
|                                                |                  | Yes (n=40)           | No (n=62)       |         |
| Age, yr                                        | 45.8 ± 17.1      | 51.7 ± 13.8          | 41.6 ± 18.1     | 0.02    |
| Male/female, n                                 | 69/33            | 28/12                | 41/21           | 0.81    |
| Baseline serum creatinine, µmol/L              | 84.4 ± 14.2      | 87.5 ± 12.8          | 82.2 ± 14.9     | 0.17    |
| Baseline eGFR, ml/min/1.73m <sup>2</sup>       | 85.7 ± 17.4      | 79.3 ± 9.2           | 89.8 ± 20.0     | 0.002   |
| AKI etiology, n (%)                            |                  |                      |                 |         |
| Ischemic                                       | 25 (24.5)        | 10 (25.0)            | 15 (24.2)       | 0.84    |
| Drug-induced                                   | 40 (42.2)        | 14 (35.0)            | 26 (41.9)       | 0.22    |
| Glomerulonephritis                             | 29 (28.4)        | 11 (27.5)            | 18 (29.0)       | 0.84    |
| Sepsis                                         | 4 (3.9)          | 3 (7.5)              | 1 (1.6)         | 0.14    |
| Others                                         | 4 (3.9)          | 2 (5.0)              | 2 (3.2)         | 0.77    |
| AKI stage 2&3, n (%)                           | 80 (78.4)        | 35 (87.5)            | 45 (72.6)       | 0.07    |
| RRT, n (%)                                     | 46 (47.1)        | 22 (55.0)            | 24 (38.7)       | 0.04    |
| Pathology diagnosis                            |                  |                      |                 |         |
| ATI, tubulointerstitial involvement (%)        |                  |                      |                 |         |
| - < 25%                                        | 62 (60.8)        | 17 (42.5)            | 45 (72.6)       | 0.002   |
| - 25% to 50%                                   | 24 (23.5)        | 13 (32.5)            | 11 (17.7)       | 0.06    |
| - > 50%                                        | 16 (15.7)        | 10 (25.0)            | 6 (9.7)         | 0.04    |
| Other lesions combined with ATI, n (%)         |                  |                      |                 |         |
| Malignant arteriolar sclerosis                 | 3 (2.9)          | 3 (7.5)              | 0 (0)           | 0.08    |
| TMA                                            | 3 (2.9)          | 1 (2.5)              | 2 (3.2)         | 0.47    |
| Glomerulonephritis                             | 29 (28.4)        | 11 (27.5)            | 18 (29.0)       | 0.84    |
| -Acute glomerulonephritis                      | 3 (2.9)          | 1 (2.5)              | 2 (3.2)         | 0.47    |
| -Crescentic glomerulonephritis                 | 10 (9.8)         | 5 (12.5)             | 5 (8.1)         | 0.64    |
| -Other glomerulonephritis                      | 16 (15.7)        | 5 (12.5)             | 11 (17.7)       | 0.38    |
| TBM rupture/TEC necrosis, n (%)                | 24 (23.5)        | 13 (32.5)            | 11 (17.7)       | 0.03    |
| Parameters at time of AKI diagnosis            |                  |                      |                 |         |
| Serum creatinine, µmol/L                       | 441.8 ± 31.6     | 527.4 ± 54.8         | 386.5 ± 36.9    | 0.02    |
| Serum albumin, g/L                             | 33.0 ± 1.9       | 33.2 ± 2.3           | 32.5 ± 1.7      | 0.80    |
| Hemoglobin, g/L                                | 109.2 ± 3.4      | 95.6 ± 4.2           | 117.7 ± 4.4     | 0.001   |
| Plasma CK20, ng/mL                             | 3.4 (2.0-6.1)    | 4.3 (2.3-6.9)        | 3.1 (1.9-5.9)   | 0.18    |
| Urinary CK20, µg/g Cr                          | 4.9 (2.6-9.0)    | 8.0 (5.1-13.6)       | 3.3 (1.9-5.9)   | <0.001  |
| Urinary KIM-1, µg/g Cr                         | 3.9 (2.3-6.9)    | 3.8 (2.1-8.3)        | 4.0 (2.5-5.9)   | 0.86    |
| Urinary NGAL, µg/g Cr                          | 191 (77-615)     | 364 (115-1118)       | 138 (58-430)    | 0.002   |
| Urinary TIMP-2*IGFBP-7, (µg/g Cr) <sup>2</sup> | 1443 (366-4634)  | 2481 (567-8096)      | 1203 (324-2684) | 0.02    |
| UACR, mg/g Cr                                  | 585 (88-3602)    | 1317 (153-4560)      | 404 (73-2752)   | 0.04    |

<sup>A</sup>Outcome was AKI to CKD or advanced CKD progression. In patients with preadmission eGFR ≥ 60 ml/min /1.73m<sup>2</sup>, AKI to CKD progression was defined as a persistent eGFR < 60ml/min/1.73m<sup>2</sup> and with a minimum 25% reduction from baseline eGFR 90 days after AKI. In patients with prehospitalization eGFR 45-60ml/min/1.73m<sup>2</sup>, AKI to advanced CKD was defined by a sustained reduction of eGFR < 30 ml/min/1.73m<sup>2</sup> 90 days after AKI.

RRT, renal replacement therapy; ATI, acute tubular injury; TMA, thrombotic microangiopathy; TBM, tubular basement membrane; TEC, tubular epithelial cell; CK20, cytokeratin 20; NGAL, Neutrophil gelatinase-associated lipocalin; KIM-1, kidney injury molecule-1; TIMP-2, tissue inhibitor of metalloproteinase-2; IGFBP-7, insulin-like growth factor-binding protein-7; UACR, urine albumin to creatinine ratio.

**Supplemental Table 3. Multivariate logistic regression analysis of uCK20 as a predictor for severe ATI<sup>A</sup> in 102 patients who received kidney biopsy**

| uCK20 (µg/g Cr) on baseline            | n   | Event<br>n (%) | Unadjusted<br>OR (95%CI) | P value | Adjusted OR <sup>B</sup><br>(95%CI) | P value |
|----------------------------------------|-----|----------------|--------------------------|---------|-------------------------------------|---------|
| <i>Categorical analysis</i>            |     |                |                          |         |                                     |         |
| Tertile1 (< 3.3 µg/g Cr)               | 34  | 2 (5.9)        | referent                 |         | referent                            |         |
| Tertile2 (3.4-7.5 µg/g Cr)             | 35  | 17 (48.6)      | 26.9 (3.3-219.7)         | <0.001  | 27.2 (3.2-227.5)                    | 0.002   |
| Tertile3 (> 7.5 µg/g Cr)               | 33  | 21 (63.6)      | 66.9 (8.1-555.2)         | <0.001  | 89.1 (9.8-809.8)                    | <0.001  |
| <i>Continuous analysis</i>             |     |                |                          |         |                                     |         |
| Per SD increase<br>(Log10 transformed) | 102 | 40 (39.2)      | 4.6 (2.1-9.9)            | <0.001  | 5.9 (2.6-12.6)                      | <0.001  |

<sup>A</sup>Severe ATI was defined as injured tubular involvement > 25% in the biopsy samples.

<sup>B</sup>Adjusted for age, sex, serum creatinine at time of AKI diagnosis, UACR at time of AKI diagnosis, and AKI stage.



**Supplemental Table 4. Performances of each biomarker at optimal cutoff based on the Youden index**

| <b>Marker</b>                           | <b>Optimal cutoff</b> | <b>Sensitivity</b> | <b>Specificity</b> |
|-----------------------------------------|-----------------------|--------------------|--------------------|
| <b>Test set</b>                         |                       |                    |                    |
| uCK20, $\mu\text{g/g Cr}$               | 5.0                   | 0.80               | 0.75               |
| uNGAL, $\mu\text{g/g Cr}$               | 274.8                 | 0.70               | 0.70               |
| uTIMP-2*IGFBP-7, $(\mu\text{g/g Cr})^2$ | 491.6                 | 0.82               | 0.45               |
| uKIM-1, $\mu\text{g/g Cr}$              | 5.5                   | 0.43               | 0.78               |
| UACR, $\text{mg/g Cr}$                  | 89.7                  | 0.89               | 0.48               |
| <b>Validation set</b>                   |                       |                    |                    |
| uCK20, $\mu\text{g/g Cr}$               | 4.1                   | 0.78               | 0.67               |
| uNGAL, $\mu\text{g/g Cr}$               | 234.2                 | 0.68               | 0.79               |
| uTIMP-2*IGFBP-7, $(\mu\text{g/g Cr})^2$ | 750.8                 | 0.80               | 0.60               |
| uKIM-1, $\mu\text{g/g Cr}$              | 4.4                   | 0.50               | 0.78               |
| UACR, $\text{mg/g Cr}$                  | 381.1                 | 0.77               | 0.54               |

**Supplemental Table 5. List of antibodies and ELISA kits used in the study**

| Name                 | Clone/label      | Host   | Application | Supplier                                     |
|----------------------|------------------|--------|-------------|----------------------------------------------|
| <b>Antibodies</b>    |                  |        |             |                                              |
| $\alpha$ -CK20       | monoclonal       | Mouse  | IHC, IF     | H00054474-M01, Abnova, Taiwan                |
| $\alpha$ -CK20       | monoclonal       | Rabbit | IHC, WB     | 82428-1-RR, Proteintech, Hubei               |
| $\alpha$ -AQP1       | monoclonal       | Rabbit | IF          | ab168387, Abcam, Cambridge, MA               |
| $\alpha$ -UMOD       | monoclonal       | Rabbit | IF          | ab207170, Abcam, Cambridge, MA               |
| $\alpha$ -AQP2       | monoclonal       | Rabbit | IF          | ab199975, Abcam, Cambridge, MA               |
| $\alpha$ -ACSL4      | monoclonal       | Rabbit | IF          | ab155282, Abcam, Cambridge, MA               |
| $\alpha$ -pMLKL      | monoclonal       | Rabbit | IF          | bsm-54104R, Bioss, Beijing                   |
| $\alpha$ -CK7        | monoclonal       | Mouse  | IHC         | 66483-1-Ig, Proteintech, Hubei               |
| $\alpha$ -CK7        | monoclonal       | Rabbit | IHC         | ab181598, Abcam, Cambridge, MA               |
| $\alpha$ -CK8        | monoclonal       | Mouse  | IHC         | bsm-33061M, Bioss, Beijing                   |
| $\alpha$ -CK8        | monoclonal       | Rabbit | IHC         | ab53280, Abcam, Cambridge, MA                |
| $\alpha$ -CK18       | monoclonal       | Mouse  | IHC         | 66187-1-Ig, Proteintech, Hubei               |
| $\alpha$ -CK18       | monoclonal       | Rabbit | IHC         | ab181597, Abcam, Cambridge, MA               |
| $\alpha$ -CK19       | monoclonal       | Mouse  | IHC         | 60187-1-Ig, Proteintech, Hubei               |
| $\alpha$ -CK19       | monoclonal       | Rabbit | IHC         | ab52625, Abcam, Cambridge, MA                |
| $\alpha$ -GAPDH      | polyclonal       | Rabbit | WB          | 10494-1-AP, Proteintech, Hubei               |
| $\alpha$ -Rabbit IgG | HRP              | Goat   | WB          | 7074, Cell Signaling Technology, Beverly, MA |
| $\alpha$ -Mouse IgG  | Alexa Flour® 555 | Goat   | IF          | ab150118, Abcam, Cambridge, MA               |
| $\alpha$ -Rabbit IgG | Alexa Flour® 488 | Goat   | IF          | ab150081, Abcam, Cambridge, MA               |
| <b>ELISA kits</b>    |                  |        |             |                                              |
| CK20                 |                  |        | ELISA       | CSB-E11710h, Cusabio, Hubei                  |
| NGAL                 |                  |        | ELISA       | KIT036, Bioporto, Hellerup                   |
| KIM-1                |                  |        | ELISA       | DY1750B, R&D Systems, Minneapolis, MN        |
| TIMP-2               |                  |        | ELISA       | DTM200, R&D Systems, Minneapolis, MN         |
| IGFBP-7              |                  |        | ELISA       | DY1334-05, R&D Systems, Minneapolis, MN      |

CK, cytokeratin; AQP, aquaporin; UMOD, uromodulin; ACSL4, Acyl-CoA synthetase long-chain family member 4; pMLKL, phosphorylated mixed lineage kinase domain-like protein; GAPDH, glyceraldehyde 3-phosphate dehydrogenase; HRP, horseradish peroxidase; NGAL, neutrophil gelatinase-associated lipocalin; KIM-1, kidney injury molecule-1; TIMP-2, tissue inhibitor of metalloproteinase 2; IGFBP-7, insulin-like growth factor-binding protein 7; IHC, immunohistochemistry; IF, immunofluorescence; WB, western blotting; ELISA, Enzyme-linked immunosorbent assay.
