# Supplementary material for: Urinary cytokeratin 20 as a predictor for chronic kidney disease following acute kidney injury
Source: JCI journal article supplement (doi:10.1172/jci.insight.180326), 2024-05-28

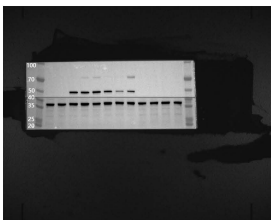

Full unedited gel for Figure 2C

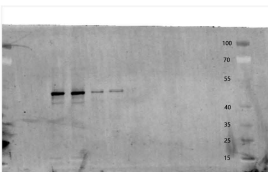

Full unedited gel for Figure 5A

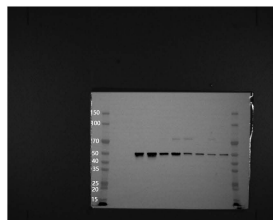

Full unedited gel for Figure 5C

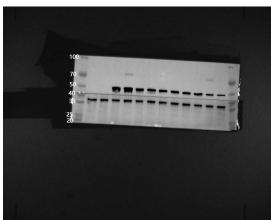

Full unedited gel for Figure S2C

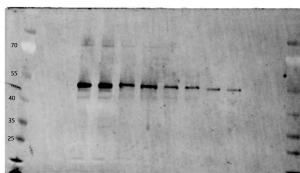

Full unedited gel for Figure S2E

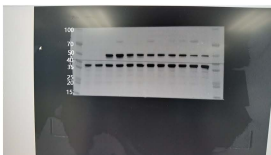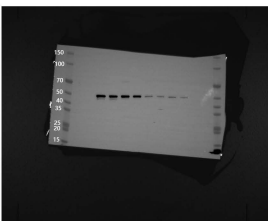

Supplement: sd3 [file 3]
